# Supplementary material for: Effects of nitrate and phosphate supply on chromophoric and fluorescent dissolved organic matter in the Eastern Tropical North Atlantic: a mesocosm study
Source: Copernicus journal article supplement (doi:10.5194/bg-12-6897-2015), 2015-12-02
Supplement: Supplementary file 1 [file bg-12-6897-2015-supplement.pdf]

Supplement of Biogeosciences, 12, 6897–6914, 2015  
<http://www.biogeosciences.net/12/6897/2015/>  
doi:10.5194/bg-12-6897-2015-supplement  
© Author(s) 2015. CC Attribution 3.0 License.

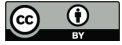

Biogeosciences  Open Access

*Supplement of*

## **Effects of nitrate and phosphate supply on chromophoric and fluorescent dissolved organic matter in the Eastern Tropical North Atlantic: a mesocosm study**

**A. N. Loginova et al.**

*Correspondence to:* A. N. Loginova (aloginova@geomar.de)

The copyright of individual parts of the supplement might differ from the CC-BY 3.0 licence.

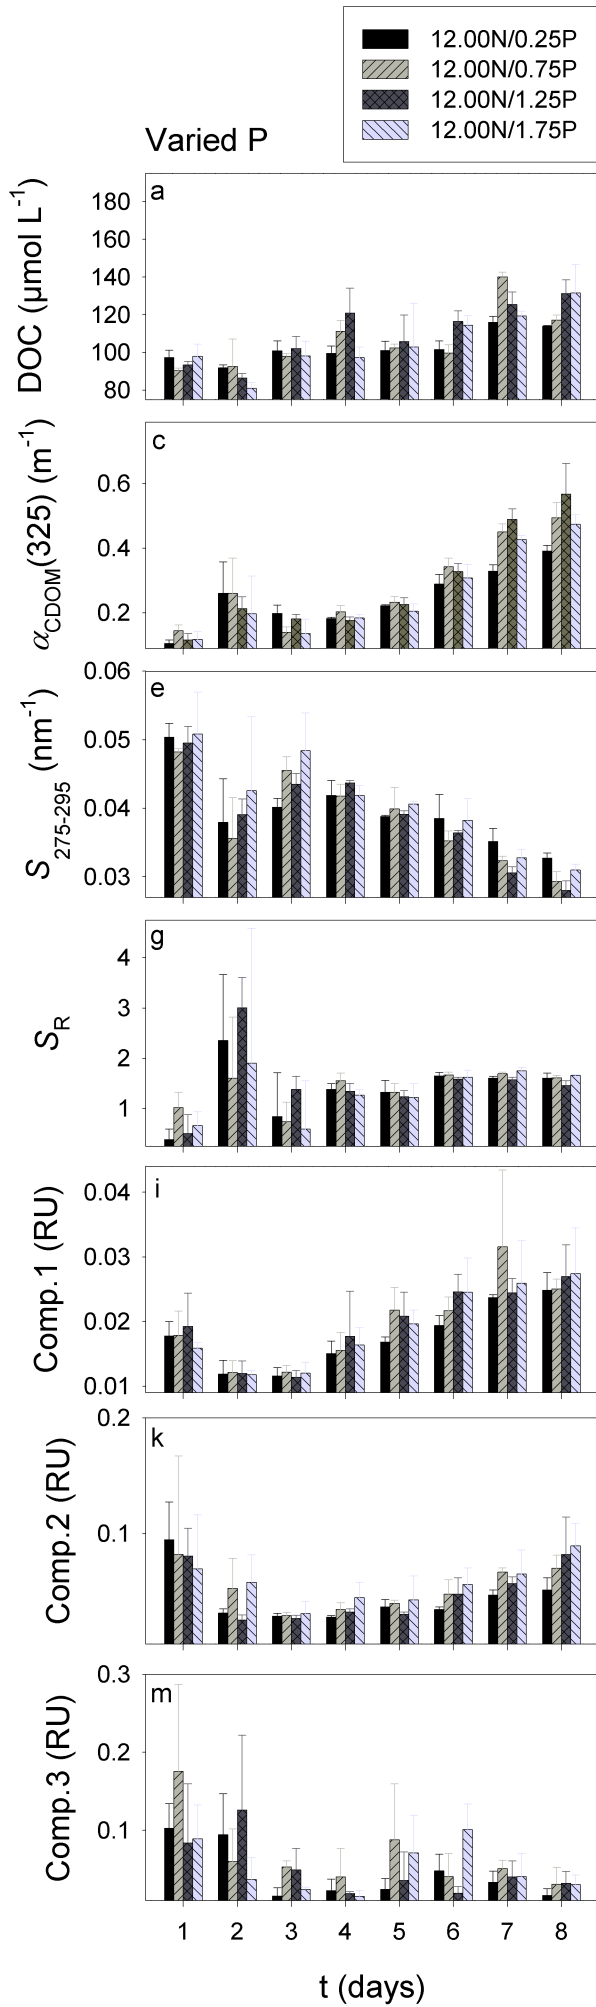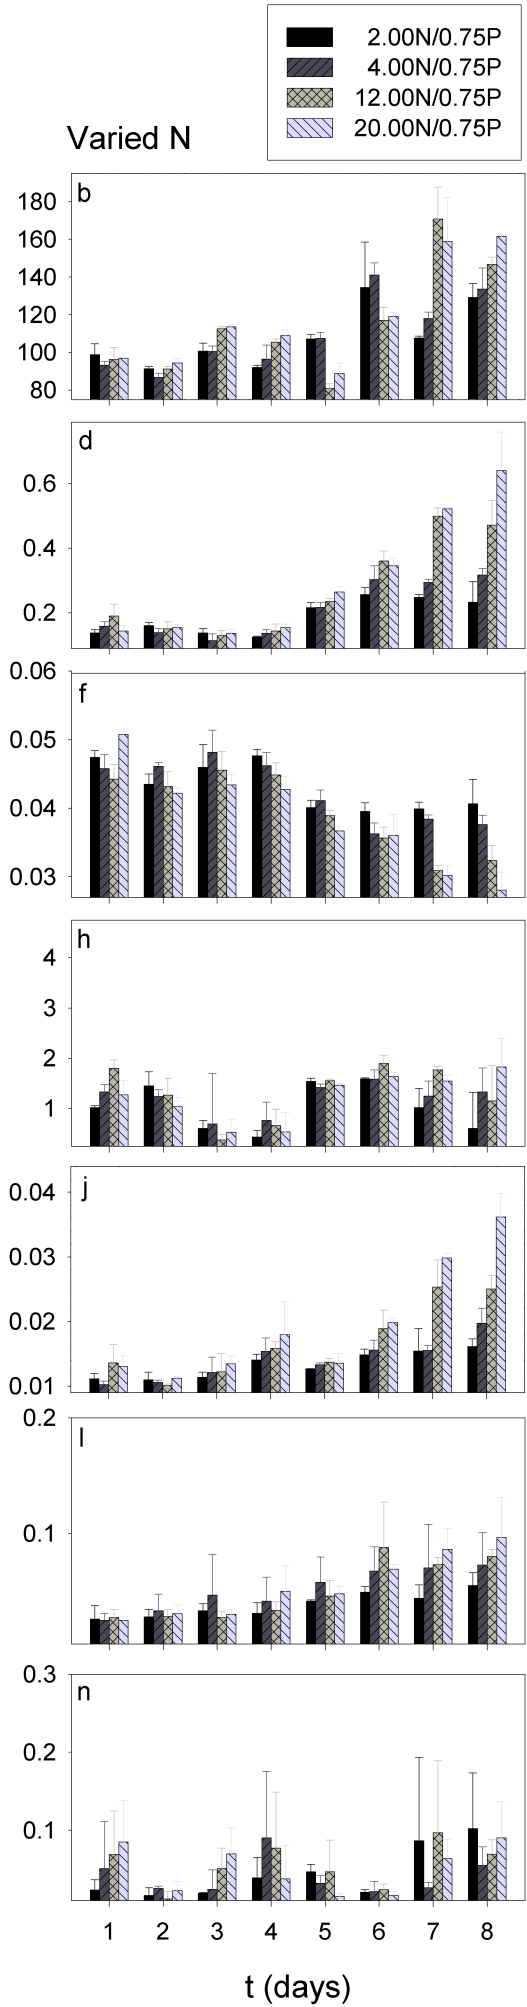

**Fig.S1** The development over time: of DOC **(a)** during the Varied P and **(b)** during the Varied N, of CDOM at 325nm ( $a_{\text{CDOM}(325)}$ ) **(c)** during the Varied P and **(d)** during the Varied N, of Spectral Slope within 275-295 nm spectral range ( $S_{275-295}$ ) **(e)** during the Varied P and **(f)** during the Varied N, of spectral slope ratio ( $S_{275-295}/S_{350-400}$ )  $S_R$  **(g)** during the Varied P and **(h)** during the Varied N, of first FDOM component fluorescence intensity (Comp.1) **(i)** during the Varied P and **(j)** during the Varied N, of second FDOM component fluorescence intensity (Comp.2) **(k)** during the Varied P and **(l)** during the Varied N, of third FDOM component fluorescence intensity (Comp.3) **(m)** during the Varied P and **(n)** during the Varied N.

**Table S2**  $\Sigma_{chl\ a}$  and  $\Sigma_{bac}$  and  $\Delta$ -values of DOC, CDOM at 325nm ( $a_{CDOM}(325)$ ), humic-like fluorescent component (Comp.1), proteinaceous amino acid-like fluorescent component (Comp.2), peptide amino acid-like fluorescent component (Comp.3) at day 8 ( $\Delta_8$ ), used for linear regression statistical tests.

| Mesocosm ID | $\Sigma_{chl\ a}$ ( $\mu\text{g L}^{-1}$ ) | $\Sigma_{bac}$ (# $\text{mL}^{-1}$ ) | $\Delta_8\text{DOC}$ ( $\mu\text{mol L}^{-1}$ ) | $\Delta_8 a_{CDOM}(325)$ ( $\text{m}^{-1}$ ) | $\Delta_8\text{Comp.1}$ (RU) | $\Delta_8\text{Comp.2}$ (RU) | $\Delta_8\text{Comp.3}$ (RU) |
|-------------|--------------------------------------------|--------------------------------------|-------------------------------------------------|----------------------------------------------|------------------------------|------------------------------|------------------------------|
| Varied P    |                                            |                                      |                                                 |                                              |                              |                              |                              |
| 1           | 8.1                                        | $1.22 \times 10^7$                   | 21                                              | 0.39                                         | 0.014                        | 0.055                        | -0.043                       |
| 2           | 10.0                                       | $9.78 \times 10^6$                   | 16                                              | 0.38                                         | 0.012                        | 0.032                        | 0.007                        |
| 3           | 10.0                                       | $9.75 \times 10^6$                   | 21                                              | 0.29                                         | 0.013                        | 0.036                        | -0.030                       |
| 4           | 7.4                                        | $9.68 \times 10^6$                   | 15                                              | 0.25                                         | 0.010                        | 0.043                        | 0.006                        |
| 6           | 9.9                                        | $1.04 \times 10^7$                   | 31                                              | 0.27                                         | 0.011                        | 0.038                        | -0.061                       |
| 7           | 11.0                                       | $9.73 \times 10^6$                   | 20                                              | 0.40                                         | 0.017                        | 0.038                        | -0.005                       |
| 8           | 12.8                                       | $9.31 \times 10^6$                   | 37                                              | 0.49                                         | -                            | -                            | -                            |
| 9           | 10.7                                       | $8.72 \times 10^6$                   | 57                                              | 0.28                                         | 0.009                        | 0.050                        | -0.007                       |
| 10          | 10.2                                       | $1.28 \times 10^7$                   | 19                                              | 0.27                                         | 0.007                        | -                            | 0.029                        |
| 11          | 11.5                                       | $9.74 \times 10^6$                   | 25                                              | 0.32                                         | 0.017                        | 0.058                        | 0.016                        |
| 12          | 7.5                                        | $9.66 \times 10^6$                   | 18                                              | 0.42                                         | 0.020                        | 0.068                        | 0.010                        |
| 13          | 7.5                                        | $9.23 \times 10^6$                   | 17                                              | 0.23                                         | 0.015                        | 0.037                        | -0.006                       |
| 14          | 7.7                                        | $9.92 \times 10^6$                   | 15                                              | 0.15                                         | 0.012                        | 0.016                        | -0.013                       |
| 15          | 14.1                                       | $1.31 \times 10^7$                   | 41                                              | 0.40                                         | 0.017                        | 0.040                        | 0.010                        |
| 16          | 7.3                                        | $9.47 \times 10^6$                   | 7                                               | 0.20                                         | 0.013                        | 0.015                        | 0.021                        |
| Varied N    |                                            |                                      |                                                 |                                              |                              |                              |                              |
| 1           | 16.5                                       | $8.15 \times 10^6$                   | 58                                              | 0.38                                         | 0.017                        | 0.056                        | 0.086                        |
| 2           | 17.1                                       | $1.04 \times 10^7$                   | 52                                              | 0.37                                         | 0.016                        | 0.051                        | 0.039                        |
| 3           | 20.3                                       | $1.04 \times 10^7$                   | 56                                              | 0.21                                         | 0.012                        | 0.048                        | 0.046                        |
| 4           | 11.3                                       | $1.05 \times 10^7$                   | 49                                              | 0.18                                         | 0.007                        | 0.073                        | 0.009                        |
| 5           | 11.3                                       | $1.05 \times 10^7$                   | 52                                              | 0.39                                         | 0.017                        | 0.073                        | -0.053                       |
| 6           | 22.7                                       | $1.08 \times 10^7$                   | 65                                              | 0.36                                         | 0.022                        | 0.040                        | 0.036                        |
| 7           | 23.7                                       | $1.10 \times 10^7$                   | 65                                              | 0.61                                         | 0.028                        | 0.098                        | 0.088                        |
| 8           | 25.7                                       | $1.05 \times 10^7$                   | 71                                              | 0.49                                         | -                            | -                            | -                            |
| 9           | 10.3                                       | $9.09 \times 10^6$                   | 41                                              | 0.17                                         | 0.017                        | 0.050                        | 0.061                        |
| 10          | 22.6                                       | $8.88 \times 10^6$                   | 79                                              | 0.34                                         | 0.019                        | 0.041                        | 0.046                        |
| 11          | 8.2                                        | $8.80 \times 10^6$                   | 38                                              | 0.16                                         | 0.012                        | 0.060                        | 0.006                        |
| 12          | 13.5                                       | $8.88 \times 10^6$                   | 62                                              | 0.21                                         | 0.009                        | 0.041                        | 0.048                        |
| 13          | 7.2                                        | $8.25 \times 10^6$                   | 37                                              | 0.09                                         | 0.007                        | 0.021                        | 0.150                        |
| 14          | 10.1                                       | $7.80 \times 10^6$                   | 47                                              | 0.36                                         | 0.010                        | 0.030                        | -0.057                       |
| 15          | 7.0                                        | $7.99 \times 10^6$                   | 32                                              | 0.01                                         | 0.004                        | 0.024                        | -0.006                       |
| 16          | 6.5                                        | $7.75 \times 10^6$                   | 45                                              | 0.12                                         | 0.004                        | 0.036                        | 0.113                        |
